# Supplementary material
Source: PubMed Central journal article supplement (PMC8867471)
Supplement: NIHMS1776072-supplement-Table_S1.pdf [file NIHMS1776072-supplement-Table_S1.pdf]

# Trade off predictivity and explainability for ML-powered predictive toxicology: an in-depth investigation with Tox21 datasets

Leihong Wu<sup>1</sup>, Ruili Huang<sup>2</sup>, Igor V. Tetko,<sup>3</sup> Zhonghua Xia,<sup>3</sup> Joshua Xu<sup>1</sup>, Weida Tong<sup>1\*</sup>

<sup>1</sup> Division of Bioinformatics and Biostatistics, National Center for Toxicological Research, FDA. 3900 NCTR Rd., Jefferson, Arkansas, 72079, USA

<sup>2</sup> Division of Preclinical Innovation, National Center for Advancing Translational Sciences, National Institutes of Health, 9800 Medical Center Drive, Rockville, Maryland 20850, USA

<sup>3</sup> Institute of Structural Biology, Helmholtz Zentrum München-Research Center for Environmental Health (GmbH), Ingolstädter Landstraße 1, 85764, Neuherberg, Germany

*Disclaimer: The views presented in this article do not necessarily reflect those of the U.S. Food and Drug Administration or the National Institutes of Health. Any mention of commercial products is for clarification and is not intended as an endorsement.*

**Table s1.** Averaged/collapsed AUC for 65 Tox21 assays

| <b>ASSAY</b>                                   | <b>Positive</b> | <b>Negative</b> | <b>AUC</b> | <b>AUC_TEST</b> |
|------------------------------------------------|-----------------|-----------------|------------|-----------------|
| <i>tox21-er-luc-bg1-4e2-agonist-p4 (1)</i>     | 104             | 6364            | 0.93       | 0.90            |
| <i>tox21-pr-bla-agonist-p1 (1)</i>             | 103             | 6465            | 0.90       | 0.95            |
| <i>tox21-erb-bla-p1 (1)</i>                    | 85              | 6296            | 0.88       | 0.92            |
| <i>tox21-ms-ache-p2 (-1)</i>                   | 93              | 6586            | 0.87       | 0.81            |
| <i>tox21-mitotox-p1 (-1)</i>                   | 745             | 4551            | 0.87       | 0.85            |
| <i>tox21-ahr-p1 (1)</i>                        | 692             | 5321            | 0.86       | 0.89            |
| <i>tox21-pr-bla-antagonist-p1 (-1)</i>         | 667             | 4919            | 0.86       | 0.89            |
| <i>tox21-hdac-p1 (-1)</i>                      | 251             | 6287            | 0.86       | 0.89            |
| <i>tox21-ar-bla-agonist-p1 (1)</i>             | 216             | 6149            | 0.85       | 0.88            |
| <i>tox21-pxr-p1 (1)</i>                        | 1288            | 4259            | 0.85       | 0.85            |
| <i>tox21-luc-biochem-p1 (-1)</i>               | 592             | 5702            | 0.85       | 0.87            |
| <i>tox21-ar-mda-kb2-luc-agonist-p3 (1)</i>     | 167             | 6190            | 0.85       | 0.88            |
| <i>tox21-car-agonist-p1 (1)</i>                | 671             | 5288            | 0.84       | 0.86            |
| <i>tox21-car-antagonist-p1 (-1)</i>            | 810             | 4443            | 0.84       | 0.88            |
| <i>tox21-ar-mda-kb2-luc-antagonist-p2 (-1)</i> | 650             | 4577            | 0.84       | 0.83            |
| <i>tox21-rar-agonist-p1 (1)</i>                | 265             | 5196            | 0.84       | 0.89            |
| <i>tox21-ache-p1 (-1)</i>                      | 601             | 5540            | 0.83       | 0.87            |
| <i>tox21-err-p1 (1)</i>                        | 818             | 4784            | 0.83       | 0.84            |
| <i>tox21-pgc-err-p1 (-1)</i>                   | 303             | 4542            | 0.83       | 0.85            |
| <i>tox21-er-luc-bg1-4e2-antagonist-p1 (-1)</i> | 334             | 5611            | 0.81       | 0.86            |
| <i>tox21-ar-bla-antagonist-p1 (-1)</i>         | 386             | 5265            | 0.81       | 0.84            |
| <i>tox21-gr-hela-bla-agonist-p1 (1)</i>        | 156             | 6224            | 0.81       | 0.90            |
| <i>tox21-rar-antagonist-p2 (-1)</i>            | 495             | 4155            | 0.81       | 0.88            |
| <i>tox21-ache-p3 (-1)</i>                      | 292             | 6068            | 0.81       | 0.84            |
| <i>tox21-gr-hela-bla-antagonist-p1 (-1)</i>    | 281             | 5270            | 0.81       | 0.86            |
| <i>tox21-ache-p5 (-1)</i>                      | 190             | 6396            | 0.81       | 0.82            |
| <i>tox21-erb-bla-antagonist-p1 (-1)</i>        | 342             | 5073            | 0.81       | 0.77            |
| <i>tox21-aromatase-p1 (-1)</i>                 | 402             | 5081            | 0.80       | 0.83            |
| <i>tox21-shh-3t3-gli3-antagonist-p1 (-1)</i>   | 633             | 4133            | 0.80       | 0.86            |
| <i>tox21-err-p1 (-1)</i>                       | 373             | 4828            | 0.80       | 0.81            |
| <i>tox21-ar-mda-kb2-luc-agonist-p1 (1)</i>     | 256             | 6573            | 0.79       | 0.86            |
| <i>tox21-er-bla-agonist-p2 (1)</i>             | 328             | 6161            | 0.79       | 0.81            |
| <i>tox21-pgc-err-p1 (1)</i>                    | 290             | 5427            | 0.79       | 0.84            |
| <i>tox21-ror-cho-antagonist-p1 (-1)</i>        | 291             | 4349            | 0.79       | 0.65            |
| <i>tox21-er-luc-bg1-4e2-antagonist-p2 (-1)</i> | 277             | 5380            | 0.78       | 0.84            |
| <i>tox21-p53-bla-p1 (1)</i>                    | 415             | 6031            | 0.78       | 0.80            |
| <i>tox21-ar-mda-kb2-luc-antagonist-p1 (-1)</i> | 299             | 5339            | 0.77       | 0.73            |
| <i>tox21-are-bla-p1 (1)</i>                    | 750             | 4377            | 0.77       | 0.82            |
| <i>tox21-h2ax-cho-p2 (1)</i>                   | 259             | 5985            | 0.77       | 0.76            |
| <i>tox21-pparg-bla-antagonist-p1 (-1)</i>      | 295             | 5101            | 0.77       | 0.81            |
| <i>tox21-fxr-bla-antagonist-p1 (-1)</i>        | 163             | 5364            | 0.77       | 0.81            |
| <i>tox21-rxr-bla-agonist-p1 (1)</i>            | 254             | 4982            | 0.77       | 0.81            |

|                                            |     |      |      |      |
|--------------------------------------------|-----|------|------|------|
| <i>tox21-er-bla-antagonist-p1 (-1)</i>     | 251 | 5394 | 0.77 | 0.80 |
| <i>tox21-ap1-agonist-p1 (1)</i>            | 317 | 5620 | 0.77 | 0.77 |
| <i>tox21-sbe-bla-antagonist-p1 (-1)</i>    | 263 | 5788 | 0.76 | 0.80 |
| <i>tox21-gh3-tre-agonist-p1 (1)</i>        | 94  | 6404 | 0.76 | 0.71 |
| <i>tox21-casp3-hepg2-p1 (1)</i>            | 160 | 6235 | 0.76 | 0.80 |
| <i>tox21-tshr-antagonist-p1 (-1)</i>       | 138 | 6190 | 0.75 | 0.75 |
| <i>tox21-elg1-luc-agonist-p1 (1)</i>       | 229 | 6487 | 0.75 | 0.82 |
| <i>tox21-gh3-tre-antagonist-p1 (-1)</i>    | 255 | 4739 | 0.75 | 0.78 |
| <i>tox21-tshr-agonist-p1 (1)</i>           | 216 | 5967 | 0.75 | 0.78 |
| <i>tox21-vdr-bla-agonist-p1 (1)</i>        | 28  | 5939 | 0.74 | 0.67 |
| <i>tox21-vdr-bla-antagonist-p1 (-1)</i>    | 48  | 5437 | 0.74 | 0.71 |
| <i>tox21-pparg-bla-agonist-p1 (1)</i>      | 172 | 5915 | 0.73 | 0.75 |
| <i>tox21-hre-bla-agonist-p1 (1)</i>        | 33  | 6297 | 0.73 | 0.71 |
| <i>tox21-er-luc-bg1-4e2-agonist-p2 (1)</i> | 601 | 4945 | 0.73 | 0.81 |
| <i>tox21-esre-bla-p1 (1)</i>               | 56  | 5835 | 0.73 | 0.80 |
| <i>tox21-trhr-hek293-p1 (-1)</i>           | 48  | 6543 | 0.73 | 0.72 |
| <i>tox21-sbe-bla-agonist-p1 (1)</i>        | 25  | 6702 | 0.72 | 0.77 |
| <i>tox21-hse-bla-p1 (1)</i>                | 313 | 5561 | 0.72 | 0.76 |
| <i>tox21-trhr-hek293-p1 (1)</i>            | 41  | 6608 | 0.72 | 0.58 |
| <i>tox21-fxr-bla-agonist-p2 (1)</i>        | 90  | 6032 | 0.71 | 0.75 |
| <i>tox21-ppard-bla-agonist-p1 (1)</i>      | 77  | 5780 | 0.71 | 0.73 |
| <i>tox21-casp3-cho-p1 (1)</i>              | 80  | 6517 | 0.71 | 0.78 |
| <i>tox21-ppard-bla-antagonist-p1 (-1)</i>  | 56  | 5568 | 0.70 | 0.73 |

**Table s2.** Full Dataset of the Chemicals and Endpoints used in this study

(separately attached)
